# Supplementary material
Source: publisher figshare collection journal article supplement (https://tandf.figshare.com/ndownloader/files/13986347)
Supplement: Supplementary file 1 [file 13986347]

# Annex 1

# Tree farmer questionnaire

Village Name_____________ # ___________

Date: ________________

| Country |  |
| --- | --- |
| Region |  |
| District |  |
| Village |  |
| Sub-village |  |

1. **Household information:**

| 1.1 Name of the interviewee: | Mr/Mrs/Ms | | | Education: |
| --- | --- | --- | --- | --- |
| 1.2 Head of the household |  | | | |
| 1.3 Marital status: |  | | | |
| 1.4 Age: |  | | | |
| 1.5 Ethnic group |  | | | |
| 1.6 Family members (number) living at the farm, number of children | Adults Children Children living with parents | | | |
| 1.7 How many years have you/has your family owned your farm? | Interviewee since Family since | | | |
| 1.8 Have you any plans to sell your farm in near future (in coming 5-10 yrs)? | Yes../ No | | | |
| 1.9 Do you have a formal title for your lands? Current holder name (husband/wife/both/other) | Yes../ No | | | |
| 1.9 Who will continue farming after you in the farm? |  | | | |
| 1.10 Heritance to | several children |  |
| one of the children |  |
| another person |  |
| The farm will be sold |  |
| Other, what? |  | | |
| 1.12 Total HH income last year (2014) (agriculture and other sources: wood sales, labour, other business – specify the most important sources)  Was last year’s income in a normal level? |  | | | |

1. **Farm details**

| 2.2 | Do you live permanently in the village/your farm?  yes /no /yes, except ___  If you do not live permanently in the village/on your farm, how many kilometres distance you have from your home to the farm? ______________ km  Do you own other farms? Total area of your farms?  yes/ no _______________ ha/acres |
| --- | --- |
| 2.3 How many persons work in the farm | _________ (permanent)  Are you using temporary paid labour?  _______ man days/year |

| 2.4 Main crops in the farm and their area (in ha/acres) and production | Crop | | Area (ha/acres), production (bags/kg per year) | | Own use/sales (bags) |
| --- | --- | --- | --- | --- | --- |
|  | |  | |  |
|  | |  | |  |
|  | |  | |  |
|  | |  | |  |
|  | |  | |  |
|  | |  | |  |
|  | |  | |  |
|  | |  | |  |
| 2.5 Self-sufficiency of food | Which foods your farm produces sufficiently for your own use? | | | | |
| 2.6 Number of livestock | How many animals you have in your farm (number, sales/own use) | | | | |
|  | | |  | |
|  | | |  | |
|  | | |  | |
|  | | |  | |
| 2.7 Do you have any (natural) forest in your farm | ha/acres | | | | |
| 2.8 Other land | How much other land you have in your farm (ha/acres)? | | | | |
| Wasteland |  | | | |
| Fallow land |  | | | |
| 2.9 Ownership | Type of ownership of the planted areas:  *private, customary, leasehold, community lands* | | | | |

1. **Tree plantation details**

| 3.1 Total area of the farm (ha/acres) | (both agricultural and forest land) | | | | | | | | | | | | | |
| --- | --- | --- | --- | --- | --- | --- | --- | --- | --- | --- | --- | --- | --- | --- |
| 3.2 Tree plantation area | Total area  Species planted, year of planting, former use of land | | | | | | | | | | | | | |
| Species | | Area | Year | | | | Former use of land | | | | | | |
|  | |  |  | | | |  | | | | | | |
|  | |  |  | | | |  | | | | | | |
|  | |  |  | | | |  | | | | | | |
|  | |  |  | | | |  | | | | | | |
|  | |  |  | | | |  | | | | | | |
|  | |  |  | | | |  | | | | | | |
| 3.3 Purpose of the tree plantation | Is your tree plantation for | | | | | | | | | | | | | |
| Commercial wood production | | | | | |  | |  | | | | | |
| Fire wood | | | | | |  | |  | | | | | |
| Own use (construction, firewood) | | | | | |  | |  | | | | | |
| Do/did you have a plan where to sell the trees - where?  yes / no __________________________________________________  _________________________________________________________ | | | | | | | | | | | | | |
| 3.4 Seedlings and materials | Where did you get/buy seedlings/seeds used on your plantation?  Seeds:  Seedlings/stumps: | | | | | | | | | | | | | |
| 3.5 Management | What kind of forest management activities have been carried out on your plantation? | | | | | | | | | | | | | |
|  | | | | | Year | | | | | | Year | | Year |
| firelines | | | | |  | | | | | |  | |  |
| replanting | | | | |  | | | | | |  | |  |
| weeding | | | | |  | | | | | |  | |  |
| slashing | | | | |  | | | | | |  | |  |
| pruning | | | | |  | | | | | |  | |  |
| thinning | | | | |  | | | | | |  | |  |
| none – why? | | | | |  | | | | | | | | |
| 3.6 | If you’re doing pruning, at which age you normally do the first pruning and how many times you do it before harvest?  Why you’re doing pruning (what benefits you see in pruning)? | | | | | | | | | | | | | |
| 3.7 Investment | How much have you invested your own money and your family time on your plantation? When? Visited teak plot | | | | | | | | | | | | | |
| Phase | | | | Time (days/yr) – own time | | | | | | | | Money (hired labour, seedlings) | |
| Establishment (Year meaning plot establishment year)  Year_______ | | | |  | | | | | | | |  | |
| Slashing  Year_______  Year_______  Year_______ | | | |  | | | | | | | |  | |
| Pruning  Year_______  Year_______  Year_______ | | | |  | | | | | | | |  | |
| Thinning, Final cut | | | |  | | | | | | | |  | |
| 3.8 | Have you been using intercropping on this plantation? How many years?  Yes / No ________years | | | | | | | | | | | | | |
| 3.9 | Have you been using intercropping on other woodlots? For how many years?  Yes / No ________years | | | | | | | | | | | | | |
| 3.10 | After harvesting the trees, are you planning to grow agricultural crops on your woodlots? For how many years? If not, what will happen to the woodlot area?  Yes / No ________years | | | | | | | | | | | | | |
| 3.11 | At which age you’re planning to sell/cut the trees on this woodlot? ______yrs  At which age you normally cut/sell trees? _______ yrs | | | | | | | | | | | | | |
| 3.12 Expectations for tree planting | | What kind of benefits and problems you see in tree planting? | | | | | | | | | | | | |
| 1. Benefits | | fodder/fire wood/construction wood | | | | | |  | |
| some NTFP for own use or sale | | | | | |  | |
| soil protection from erosion | | | | | |  | |
| protection of biodiversity/nature | | | | | |  | |
| water management (improving water quantity/quality) | | | | | |  | |
| protection of the farm from encroachment/illegal invasion | | | | | |  | |
| farm value increase (to sell/inherit) | | | | | |  | |
| protection against wind/wind erosion | | | | | |  | |
| improving the landscape | | | | | |  | |
| providing shade | | | | | |  | |
| improve local microclimate | | | | | |  | |
| improving the recreational values and touristic potential | | | | | |  | |
| combat against climate change/carbon credits | | | | | |  | |
| opportunities to work on the farm | | | | | |  | |
| others (specify) | | | | | |  | | | | | | |
| 1. Problems | | reduced availability of agricultural/pasture land | | | | | |  | |
| deterioration of landscape values | | | | | |  | |
| excessive amount of work | | | | | |  | |
| too much shade | | | | | |  | |
| high investment risk | | | | | |  | |
| long period before trees produce income | | | | | |  | |
| inadequate information/knowledge | | | | | |  | |
| high tree mortality (specify reason) | | | | | |  | |
| complicated procedures with authorities | | | | | |  | |
| conflicts with neighbours of land use | | | | | |  | |
| others (specify) | | | | | |  | | | | | | |
| 3.13 Firewood and timber | | Where do you get your timber now?  And in the future? | | | | | | | | | | | | |
| 3.14 Incentives | | Have you participated or do you currently participate in a reforestation/afforestation programme:  no / yes  name of the programme | | | | | | | | | | | | |
| How many years did you participate/you have participated in the programme  years | | | | | | | | | | | | |
| Have you received support to your tree plantations? From where/whom?  yes../ no | | | | | | | | | | | | |
| What kind of support you received and how much? | | | | | | | | | | | | |
| credit/loan | | | | | |  | | | | | | |
| grant | | | | | |  | | | | | | |
| seedlings | | | | | |  | | | | | | |
| fertilizers | | | | | |  | | | | | | |
| labour | | | | | |  | | | | | | |
| extension support | | | | | |  | | | | | | |
| other | | | | | |  | | | | | | |
| 3.15 | | If you have received a private credit/loan for tree planting, have you been or will you be able to pay it back?  yes../no../ don’t know Why? | | | | | | | | | | | | |
| 3.16 | | Significance of the incentives received – was it important in decision making on plantation establishment? | | | | | | | | | | | | |
| Very important | | | | | |  | | |
| somewhat important | | | | | |  | | |
| not important | | | | | |  | | |
| 3.17 | | How much do you estimate that you have lost potential agricultural produce due to tree planting (amount/value – annual and total) – bags of agricultural produce/ha(/acre) | | | | | | | | | | | | |
| 3.18 Organization | | Are you a member in a tree growers association or a forest cooperative?  yes / no  What kind of support you have received through the association/cooperative? | | | | | | | | | | | | |

1. **Extension support and Plantation management**

| 4.1 Training | Where did you learn tree plantation management? | | | | | | | | | |
| --- | --- | --- | --- | --- | --- | --- | --- | --- | --- | --- |
| 4.2 Technical support & management | Have you received any extension/technical support in plantation establishment and management? List support below.  Which organization provided the extension service?  (NGO, government, private, TGA/cooperative)  How would you qualify the extension services (very good/sufficient/poor) | | | | | | | | | |
| Plantation phase/activity (planning, species/site selection, preparation, establishment, replanting, early years management such as weeding, pruning, slashing thinnings, marketing/selling, final cut) | | | | Year | | Organization | | | Quality of service |
|  | | | |  | |  | | |  |
|  | | | |  | |  | | |  |
|  | | | |  | |  | | |  |
|  | | | |  | |  | | |  |
|  | | | |  | |  | | |  |
|  | | | |  | |  | | |  |
| 4.3 | Have you had problems in tree growing? What kind? | | | | | | | | | |
| 4.4 | How do you qualify plantation tree growth (by species)?  Excellent / Good / Average / Low | | | | | | | | | |
| species | | | | | growth | | | | |
| Visited plot | | | | |  | | | | |
| Other woodlots | | | | |  | | | | |
| 4.5 | Have you had any conflicts with neighbours/community members on tree planting/land use? What kind (e.g. water, pastoralism, fire)? How did you solve it? | | | | | | | | | |
| 4.6 Sales | Have you already sold trees from your plantation (last sale)? | | | | | | | | | |
| Species | Year | Volume sold/no of stems – age of the trees  If selling timber - specify | | | | | price per m3/stem – if not known, total value | | |
|  |  |  | | | | |  | | |
|  |  |  | | | | |  | | |
|  |  |  | | | | |  | | |
| How did you sell your trees  (Marketing channel: middleman, directly to a manufacturer, through cooperative/association, other)? | | | | | | | | | |
| 4.7 | How the volume or number of trees to be sold was assessed? (visual assessment or grading rules – and which, if known)?  Who performed measurement and grading on the trees, did you observe?  Were the sold trees measured in advance or at the moment of sale or at all?  What are local ways of measuring normally? (tree girth (where on the tree), LAR (cubic yard, but they put 1.2m), pole classes (dbh etc), allowances (quite some informal but wide spread ones, like 10cm either end and 1-3 cm) | | | | | | | | | |
| 4.8 | How was the price negotiated/agreed?  Did you have any knowledge of wood market prices at the time of sale?  Do you know what the logs are used for and how much they are worth at certain point (if they know value at any point of sale e.g millgate, ex works suqare log, square landed vietiane/china etc.)? | | | | | | | | | |
| 4.9 | Have you had difficulties in selling? What kind? | | | | | | | | | |
| 4.10 | What procedures you have to go through to get the cutting/selling licence? | | | | | | | | | |
| 4.11 | How much has it cost to get the necessary licences (government fees/other costs)  __________ fees  __________ other costs | | | | | | | | | |
| 4.12 | Who performed the cutting and sawing and what tools were used?  How long did it take to buyer to harvest the trees?  How many persons were working in harvesting?  How long did it take to transport the logs from the yard? | | | | | | | | | |
| 4.13 | Did you receive the money  a) right after measurement  b) at the time of harvest/grading  c) I have not received the money (yet) | | | | | | | | | |
| 4.14 | Is your contract of sale detailed and scheduled, so that you know the process?  Yes / No | | | | | | | | | |
| 4.15 | If you apply thinning - what is obtained wood used for?  Have you been able to sell wood from thinnings and where? | | | | | | | | | |
| 4.16 Future | Are you planning to plant more trees in coming 5 years?  Absolutely / Most likely yes / Maybe / Most likely not / No / Don’t know  If yes, why and under which conditions?  If not, why? | | | | | | | | | |
| 4.17 | Which species you would prefer to plant and why?  Species:  Why? | | | | | | | | | |
| 4.18 | Have you ever been planting trees on a mixed stand? Do you prefer plantation planted with single species or mixed plantations? Why?  Single / mixed | | | | | | | | | |
| 4.19 | How are you planning to use the trees planted in the future (by species)? | | | | | | | | | |
|  | | | Species | | | | |  | |
| Cut and sell timber | | |  | | | | |  | |
| Cut firewood | | |  | | | | |  | |
| Keep the plantation as reserve | | |  | | | | |  | |
| Other (what?) | | |  | | | | |  | |
| 4.20 | In your opinion, what is a good tree plantation (describe with own words)?  Do you think your tree plantation is good? Why?  Yes/No | | | | | | | | | |
| 4.21 | Would you apply for tree planting support/incentives in the future?  Yes / No  Why? | | | | | | | | | |
| 4.22 How would you use/invest the extra money from tree planting? | | | | | | | | | | |

# Farmer questionnaire for non-planters

Code ___________

Date: ________________

| Country |  |
| --- | --- |
| Region |  |
| District |  |
| Village |  |
| Sub-village |  |

1. **Household information:**

| 1.1 Name of the interviewee: | Mr/Mrs/Ms | | | Education: |
| --- | --- | --- | --- | --- |
| 1.2 Head of the household: |  | | | |
| 1.3 Marital status: |  | | | |
| 1.4 Age: |  | | | |
| 1.5 Ethnic group (to be specified by country): |  | | | |
| 1.6 Family members (number) living in the household, number of children | members children | | | |
| 1.7 How many years have you/has your family lived on your farm? | Interviewee since Family since | | | |
| 1.8 Do you own any land?  Have you any plans to sell your farm in near future (in coming 5-10 yrs)? | Yes../ No  Yes../ No | | | |
| 1.9 Who will continue farming after you in the farm? |  | | | |
| 1.10 Do you have a CCRO for you lands? Whose name is in the CCRO? |  | | | |
| 1.11 Heritance to | several children |  |
| one of the children |  |
| another person |  |
| The farm will be sold |  |
| Other, what? |  | | |
| 1.12 Total HH income last year (2014) ) (agriculture and other sources, labour, other business)  Was last year’s income in a normal level? |  | | | |
| 1.13 Share of income from farm and from other labour (working outside of the farm) – what was the most important source of income? |  | | | |

1. **Farm details**

| 2.3 Farm occupancy | Do you live permanently in the village?  yes /no /yes but only ___ months per year  If you do not live permanently in the village/on your farm, how many kilometres distance you have from your home to the farm?  ______________ km  Do you own other farms? Total area of your farms?  yes/ no _______________ ha/acres | | | | |
| --- | --- | --- | --- | --- | --- |
| 2.4 Work force | How many persons work in the farm?  _________ (permanent) ____________ (temporary) | | | | |
| 2.5 Main crops in the farm and their area (in ha/acres)  Specify if on rented land | Crop and production (bags) | | Area (ha/acres) | | Own use/sales (bags) |
|  | |  | |  |
|  | |  | |  |
|  | |  | |  |
|  | |  | |  |
|  | |  | |  |
|  | |  | |  |
|  | |  | |  |
|  | |  | |  |
| Which foods your farm produces sufficiently for your own use? | | | | |
| 2.7 Number of livestock | How many animals you have in your farm (number) | | | | |
| Variety | | | Number of animals | |
|  | | |  | |
|  | | |  | |
|  | | |  | |
|  | | |  | |
|  | | |  | |
| 2.8 Other land | Do you have any (natural) forest you have in your farm?  ________ha/acres | | | | |
| How much other land you have in your farm (ha/acres)? | | | | |
| Wasteland |  | | | |
| Fallow land |  | | | |
| 2.9 Ownership | Type of ownership of:  *private / customary / leasehold / community lands* | | | | |

1. **Tree planting interest**

| 3.1 Future | Are you planning to plant trees in coming 5 years?  Absolutely / Most likely yes / Maybe / Most likely not / No / Don’t know  If yes, under which conditions?  If not, why?  Have you ever considered planting trees? Why?  yes / no | | | | | |
| --- | --- | --- | --- | --- | --- | --- |
| 3.2 Expectations for tree planting | If you’re planning to plant, what kind of benefits and problems you expect in tree planting?  *Probability scale 0-4:*  *0 not expected at all,*  *1 minor probability*  *2 may or may not occur*  *3 likely to occur*  *4 certain to occur* | | | | | |
|  | Expectation | | | | Before | Now |
| Benefits | fodder/fire wood/construction wood | | | |  |  |
| some NTFP for own use or sale | | | |  |  |
| soil protection from erosion | | | |  |  |
| protection of biodiversity/nature | | | |  |  |
| water management (improving water quantity/quality) | | | |  |  |
| protection of the farm from encroachment/illegal invasion | | | |  |  |
| farm value increase (to sell/inherit) | | | |  |  |
| protection against wind/wind erosion | | | |  |  |
| improving the landscape | | | |  |  |
| providing shade | | | |  |  |
| improve local microclimate | | | |  |  |
| improving the recreational values and touristic potential | | | |  |  |
| combat against climate change/carbon credits | | | |  |  |
| opportunities to work on the farm | | | |  |  |
| others (specify) |  | | | | |
| Problems | reduced availability of agricultural/pasture land | | | |  |  |
| deterioration of landscape values | | | |  |  |
| excessive amount of work | | | |  |  |
| shade | | | |  |  |
| high investment risk (FIRE) | | | |  |  |
| long period before trees produce income | | | |  |  |
| inadequate information/knowledge | | | |  |  |
| high tree mortality | | | |  |  |
| complicated procedures with authorities | | | |  |  |
| conflicts with neighbours of land use | | | |  |  |
| others (specify) |  | | | | |
| 3.3 Type of plantations preferred | Which species you would prefer to plant? Why?  Species:  Why? | | | | | |
| Do you prefer plantation planted with single species or mixed plantations? Why?  Single / mixed  Why? | | | | | |
| 3.4 Purpose of planned tree plantations | How are you planning to use the trees planted in the future (by species if known)? | | | | | |
|  | | Species |  | | |
| Cut and sell timber | |  |  | | |
| Cut firewood | |  |  | | |
| Keep the plantation as reserve | |  |  | | |
| Other (what?) | |  |  | | |
| 3.5 Knowledge and need for support  Specifying question on government role | Do you already have knowledge how to establish and manage a tree plantation? | | | | | |
| Who could advise on your tree plantation establishment and management? | | | | | |
| Do you know any incentives for tree planting (technical, financial) and would they be important to establish a plantation? | | | | | |
| Would you apply for tree planting/reforestation/afforestation incentives?  yes / no  Why? | | | | | |
| How would you use/invest the extra money from tree planting? | | | | | | |
